# Supplementary material
Source: publisher figshare collection journal article supplement (https://plos.figshare.com/articles/dataset/_/147762)

Figure S1

**A**

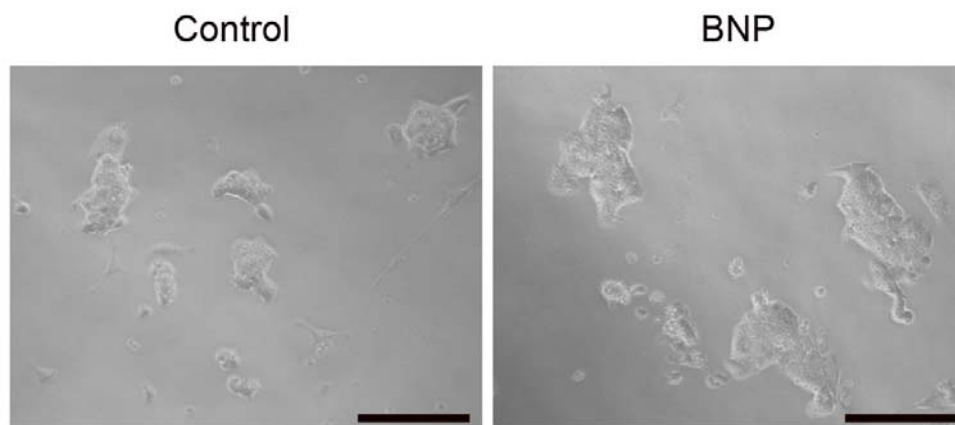

**B**

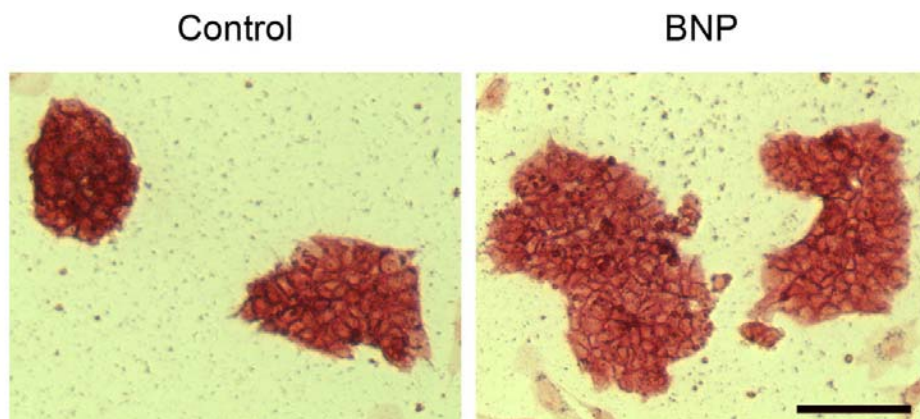

Supplement: Supplementary file 1 [file 1 › Figure_S1.pdf]

Figure S2

**A**

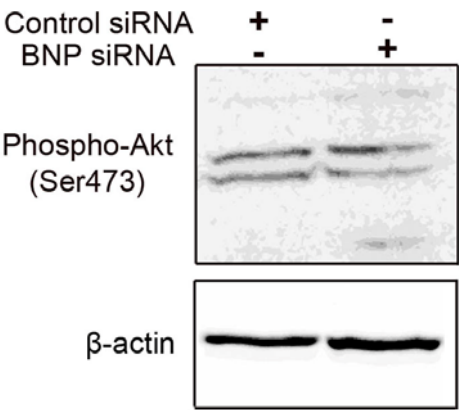

**B**

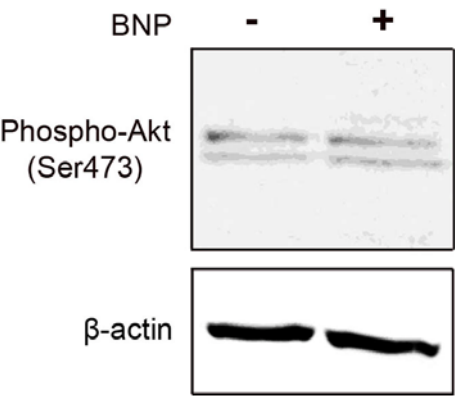

**C**

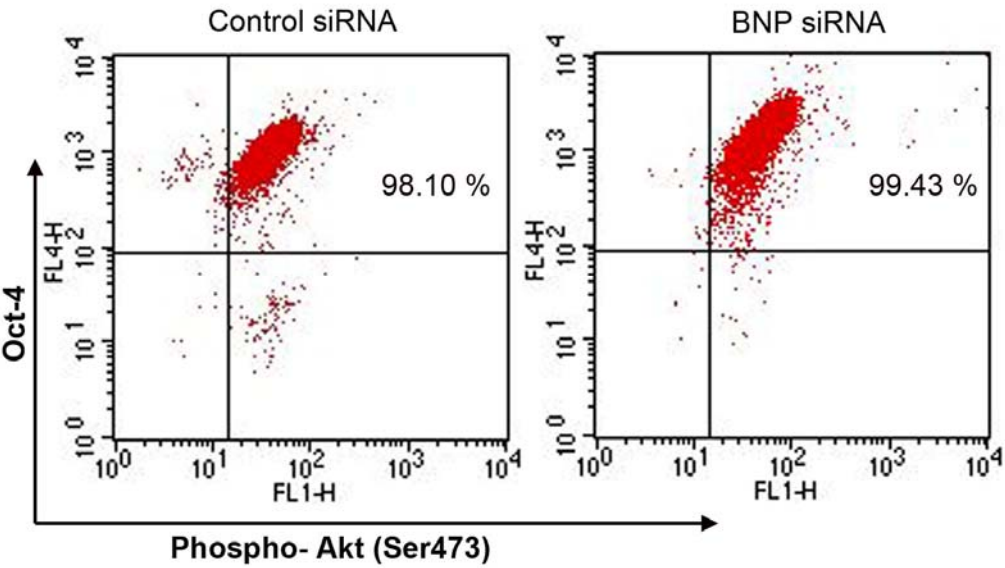

Supplement: Supplementary file 1 [file 1 › Figure_S2.pdf]
